# Supplementary material
Source: publisher site journal article supplement (https://www.dovepress.com/article/419478)
Supplement: Supplementary file 1 [file get_supplementary_file.php]

## Supplementary information file

### Appendix I

#### Database search strategy

vitreous haemorrhage  
OR diabetic vitreous haemorrhage  
OR proliferative diabetic retinopathy  
AND Vitrectomy  
OR lenercept  
AND effect  
OR visual outcome  
OR visual acuity  
AND (  
EXCLUDE ( EXACTKEYWORD,"Diabetic Retinopathy" )  
OR EXCLUDE ( EXACTKEYWORD,"Ranibizumab" )  
OR EXCLUDE ( EXACTKEYWORD,"Epiretinal Membrane" )  
OR EXCLUDE ( EXACTKEYWORD,"Cataract Extraction" )  
OR EXCLUDE ( EXACTKEYWORD,"Triamcinolone Acetonide" )  
OR EXCLUDE ( EXACTKEYWORD,"Endophthalmitis" )  
OR EXCLUDE ( EXACTKEYWORD,"Phacoemulsification" )  
OR EXCLUDE ( EXACTKEYWORD,"Vitreo-retinopathy" )  
OR EXCLUDE ( EXACTKEYWORD,"Silicone Oil" )  
OR EXCLUDE ( EXACTKEYWORD,"Ciliary Disk" )  
OR EXCLUDE ( EXACTKEYWORD,"Retina Macula Hole" )  
OR EXCLUDE ( EXACTKEYWORD,"Surgical Technique" )  
OR EXCLUDE ( EXACTKEYWORD,"Neovascular Glaucoma" )  
OR EXCLUDE ( EXACTKEYWORD,"Vasculotropin A" )  
OR EXCLUDE ( EXACTKEYWORD,"Non Insulin Dependent Diabetes Mellitus" )  
OR EXCLUDE ( EXACTKEYWORD,"Retina Vein Occlusion" )  
OR EXCLUDE ( EXACTKEYWORD,"Triamcinolone" )  
OR EXCLUDE ( EXACTKEYWORD,"Vasculotropin Inhibitor" )  
OR EXCLUDE ( EXACTKEYWORD,"Metabolism" )  
OR EXCLUDE ( EXACTKEYWORD,"Pegaptanib" )  
OR EXCLUDE ( EXACTKEYWORD,"Lens Implantation" )  
OR EXCLUDE ( EXACTKEYWORD,"Retina Macula Age Related Degeneration" )  
OR EXCLUDE ( EXACTKEYWORD,"Low Level Laser Therapy" )  
OR EXCLUDE ( EXACTKEYWORD,"Retinal Perforations" )  
OR EXCLUDE ( EXACTKEYWORD,"Insulin Dependent Diabetes Mellitus" )  
OR EXCLUDE ( EXACTKEYWORD,"Lens Implant" )  
OR EXCLUDE ( EXACTKEYWORD,"Hemoglobin A1c" )  
OR EXCLUDE ( EXACTKEYWORD,"Pathogenesis" )  
OR EXCLUDE ( EXACTKEYWORD,"Inflammation" )  
OR EXCLUDE ( EXACTKEYWORD,"Silicone Oils" )  
OR EXCLUDE ( EXACTKEYWORD,"Fluocinolone Acetonide" )  
)  
AND (  
LIMIT-TO ( EXACTKEYWORD,"Vitrectomy" )  
OR LIMIT-TO ( EXACTKEYWORD,"Pars Plana Vitrectomy" )  
OR LIMIT-TO ( EXACTKEYWORD,"Randomized Controlled Trial" )  
OR LIMIT-TO ( EXACTKEYWORD,"Clinical Trial" )  
OR LIMIT-TO ( EXACTKEYWORD,"Aflibercept" )  
)  
AND (  
LIMIT-TO ( LANGUAGE,"English" )  
)

AND (
 EXCLUDE ( EXACTKEYWORD,"Bevacizumab" )
 OR EXCLUDE ( EXACTKEYWORD,"Quality Of Life" )
 OR EXCLUDE ( EXACTKEYWORD,"Retina Vasculitis" )
 OR EXCLUDE ( EXACTKEYWORD,"Review" )
 )
 AND (
 EXCLUDE ( EXACTKEYWORD,"Retina Detachment" )
 OR EXCLUDE ( EXACTKEYWORD,"Retrospective Study" )
 OR EXCLUDE ( EXACTKEYWORD,"Vitreous Body" )
 OR EXCLUDE ( EXACTKEYWORD,"Ophthalmoscopy" )
 OR EXCLUDE ( EXACTKEYWORD,"Pathophysiology" )
 OR EXCLUDE ( EXACTKEYWORD,"Cohort Analysis" )
 OR EXCLUDE ( EXACTKEYWORD,"Sulfur Hexafluoride" )
 )
 AND (
 EXCLUDE ( EXACTKEYWORD,"Internal Limiting Membrane" )
 OR EXCLUDE ( EXACTKEYWORD,"Retinal Detachment" )
 OR EXCLUDE ( EXACTKEYWORD,"Rhegmatogenous Retinal Detachment" )
 )

## Appendix II

Cochrane Collaboration tool was used to assess the risk of bias

| Antos<br>zyk<br>AN<br>2020 |                                                  | High<br>risk<br>of<br>bias | Low<br>risk<br>of<br>bias | Uncl<br>ear<br>risk<br>of<br>bias | Comment                                                                                                                                             |
|----------------------------|--------------------------------------------------|----------------------------|---------------------------|-----------------------------------|-----------------------------------------------------------------------------------------------------------------------------------------------------|
|                            | Random<br>sequence<br>generation                 |                            | Yes                       |                                   | Computer generated sequence, therefore likely low risk of bias                                                                                      |
|                            | Allocation<br>concealm<br>ent                    | Yes                        |                           |                                   | Study coordinator assigned the patients to study groups, whose role is not clear                                                                    |
|                            | Blinding of<br>participant<br>s and<br>personnel | Yes                        |                           |                                   | Only visual acuity technicians were masked to the treatment allocation and the investigators and participants were not, which has high risk of bias |
|                            | Blinding of<br>outcome<br>assessme<br>nt         |                            | Yes                       |                                   | A medical monitor, who was masked to treatment allocation coded all adverse events                                                                  |
|                            | Incomplet<br>e outcome<br>data                   |                            | Yes                       |                                   | All the outcome measures are reported, including incomplete data set                                                                                |
|                            | Selective<br>reporting                           |                            | Yes                       |                                   | Selective reporting is not evident                                                                                                                  |
|                            | Other bias                                       |                            | Yes                       |                                   | No other risk of bias is obvious, no obvious role of funders was evident on data acquisition and data interpretation                                |
|                            |                                                  |                            |                           |                                   |                                                                                                                                                     |
|                            |                                                  |                            |                           |                                   |                                                                                                                                                     |
| AbdEl<br>hamid             |                                                  | High<br>risk               | Low<br>risk               | Uncl<br>ear                       | Comments                                                                                                                                            |

| AH 2020 |                                        | of bias | of bias | risk of bias |                                                                                                                                                                                         |
|---------|----------------------------------------|---------|---------|--------------|-----------------------------------------------------------------------------------------------------------------------------------------------------------------------------------------|
|         | Random sequence generation             | Yes     |         |              | Eyes were randomly allocated into treatment groups by simple coin flip, however, there were 17 eyes in each group, which likely lead to high risk of bias. Possible confounding effect. |
|         | Allocation concealment                 |         |         | Yes          | Not mentioned on how the participants were allocated into treatment groups.                                                                                                             |
|         | Blinding of participants and personnel |         |         | Yes          | Patient masking/investigator masking not mentioned                                                                                                                                      |
|         | Blinding of outcome assessment         |         |         | Yes          | No mention of blinding of outcome measures                                                                                                                                              |
|         | Incomplete outcome data                | Yes     |         |              | Complete data set not reported in the results, no mention of drop outs etc.                                                                                                             |
|         | Selective reporting                    |         | Yes     |              | Selective reporting is not evident                                                                                                                                                      |
|         | Other bias                             |         | Yes     |              | No other risk of bias is obvious, Trial was retrospectively registered.                                                                                                                 |
